# Supplementary material for: Recent Historical Migrations Have Shaped the Gene Pool of Arabs and Berbers in North Africa
Source: PubMed Central journal article supplement (PMC5644363; doi:10.1093/molbev/msw218), 2016-10-15
Supplement: msw218_Supp.pdf [file msw218_Supp.pdf]

# 1 Supplementary Information

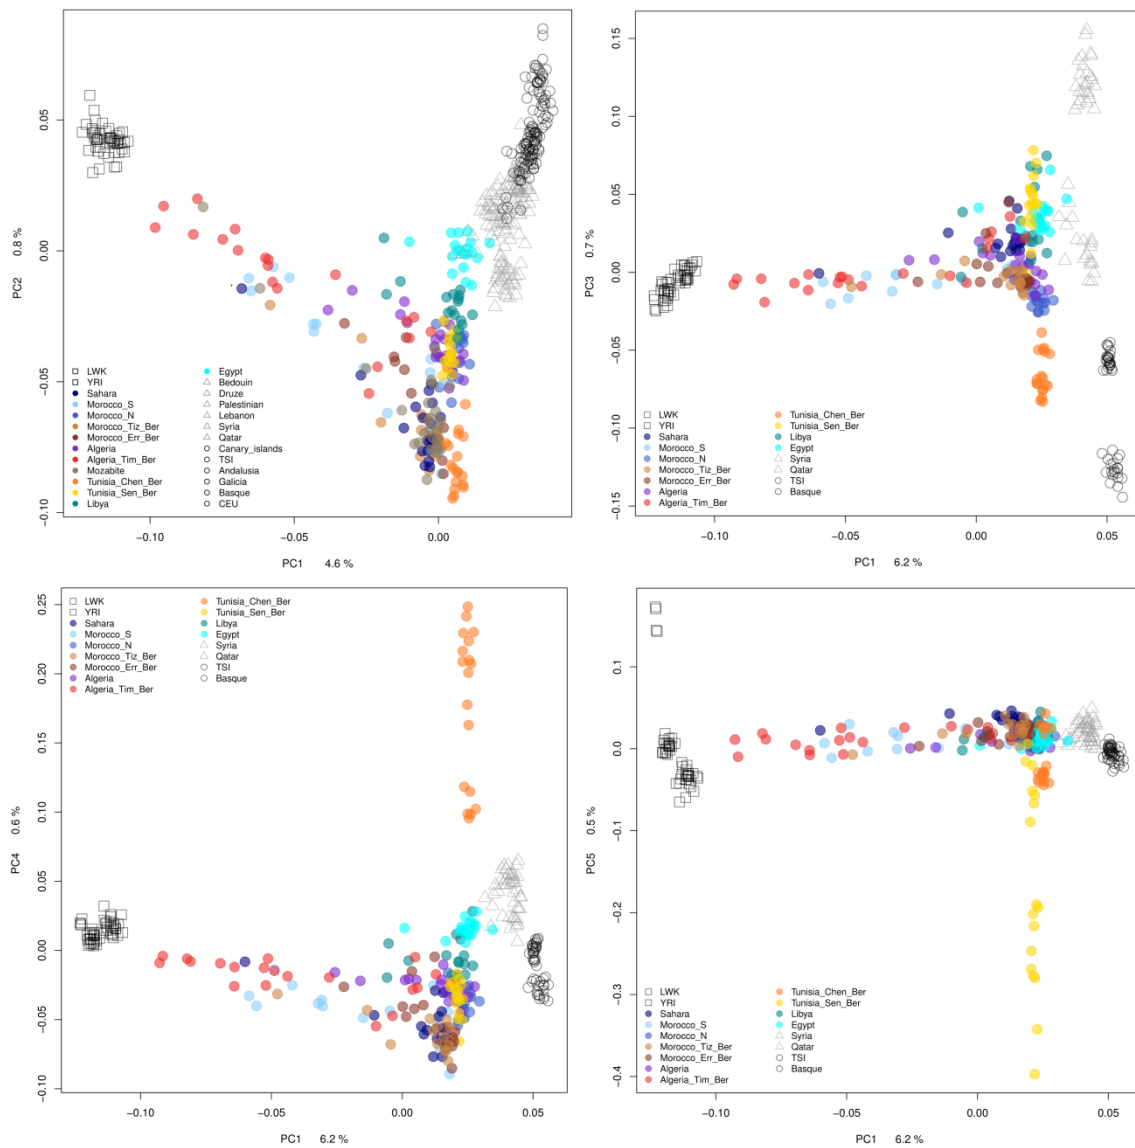

2

3 **S1 Fig. Population structure.** Principal Component Analysis. PC1 and PC2 including  
 4 an extensive dataset of Middle Eastern and European populations (Table S1). PC1 vs  
 5 PC3, PC4 and PC5 estimated with a reduced dataset of populations (the same dataset as  
 6 in Figure 1).

7

8

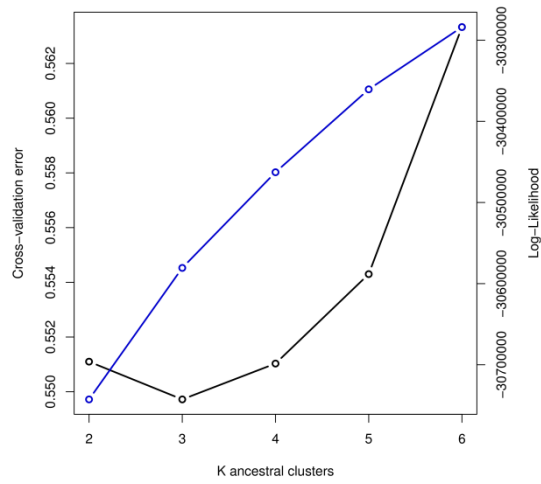

9

10 **S2 Fig. ADMIXTURE validation.** Cross-validation error and log-likelihood ratio for  
 11 ADMIXTURE analysis in Figure 1.

12

13

14

15

16

17

18

19

20

21

22

23

24

25

26

27

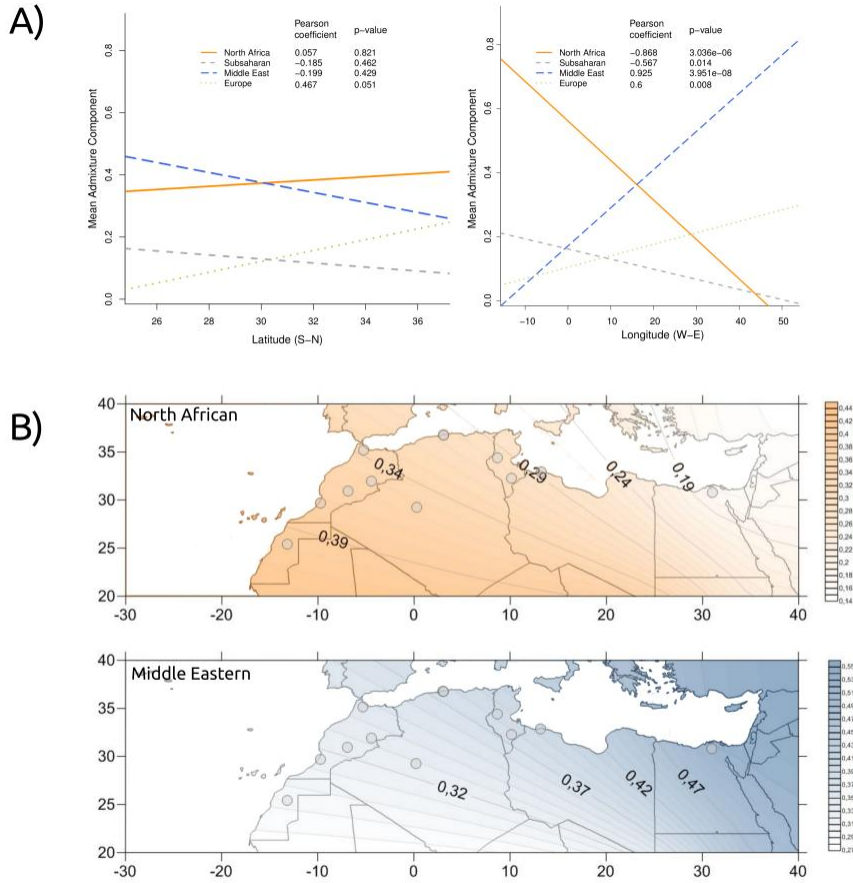

28

29 **S3 Fig. Geographic correlation of ADMIXTURE.** A) Correlation of geographical  
 30 coordinates (Latitude and Longitude) with the mean of each component proportion  
 31 given by ADMIXTURE in the North African dataset. B) Gradients of North African  
 32 and Middle Eastern admixture components are shown in the maps.

33

34

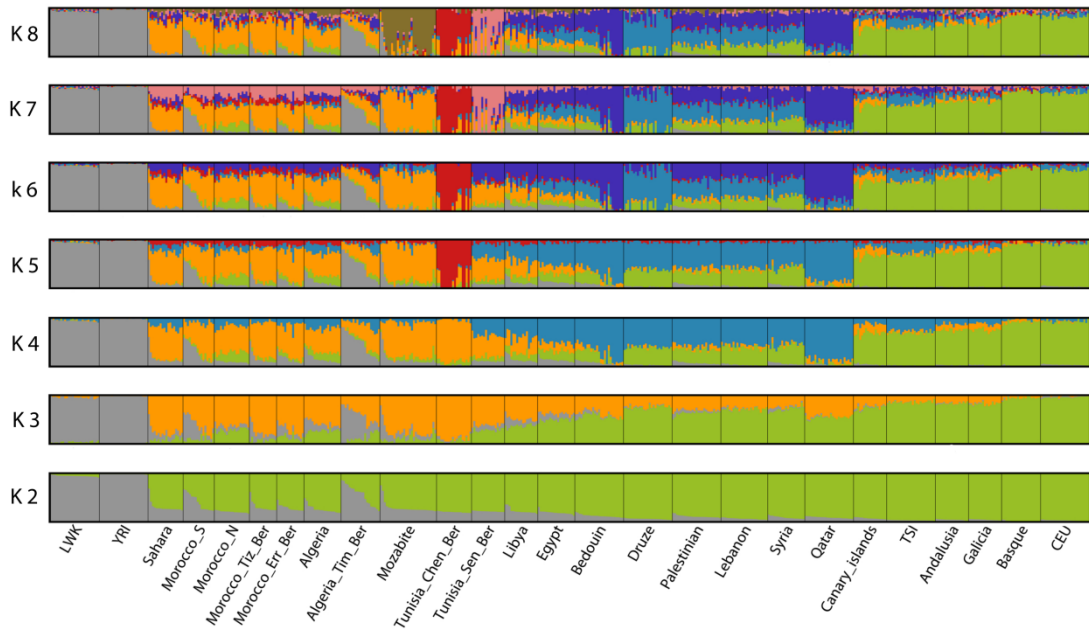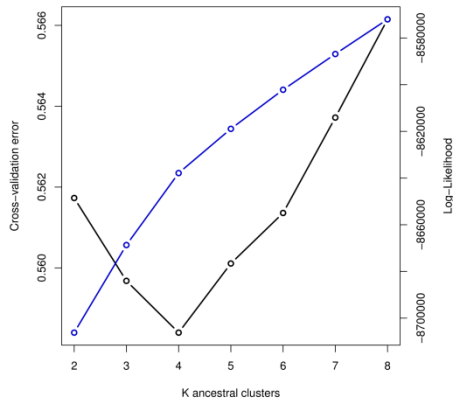

35

36 **S4 Fig. Population structure.** ADMIXTURE plot and cross-validation and log-  
 37 likelihood plot for a large dataset (Table S1) of populations from different array  
 38 platforms and lower SNP density.

39

40

41

42

43

44

45

46

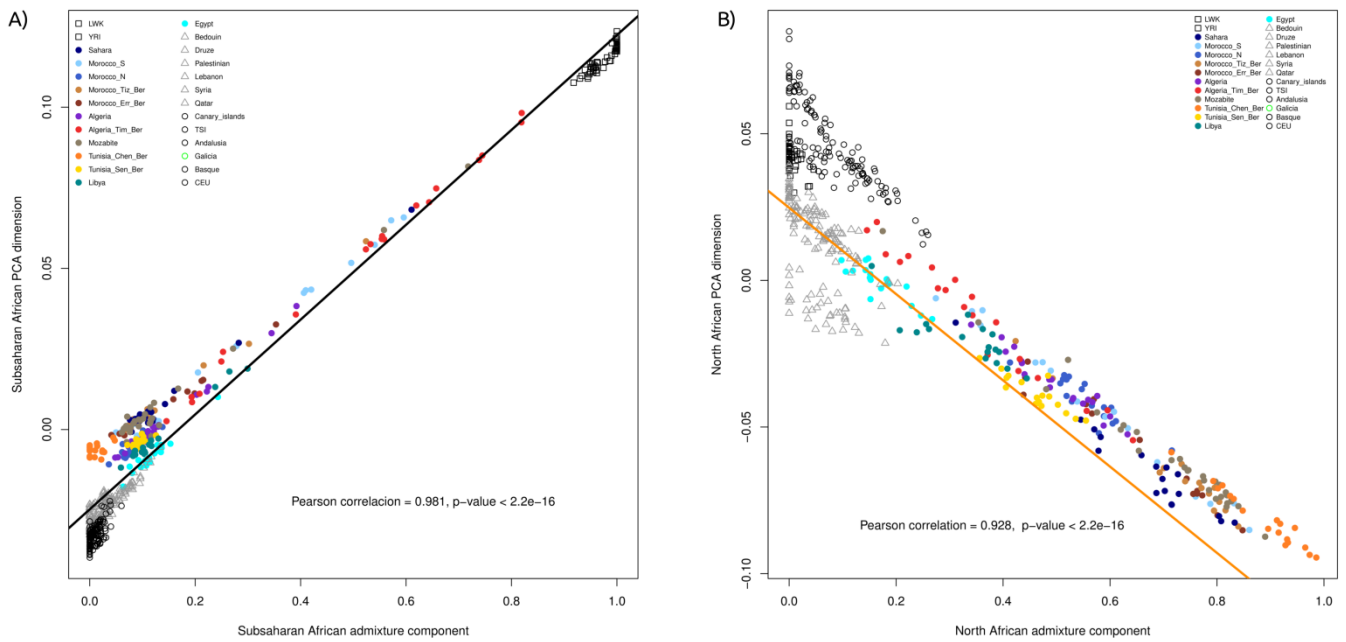

47

48 **S5 Fig.PCA and ADMIXTURE correlation.** Correlation between A) ADMIXTURE  
 49 sub-Saharan African component and PC1; and B) North African ADMIXTURE  
 50 component and PC2.

51

52

53

54

55

56

57

58

59

60

61

62

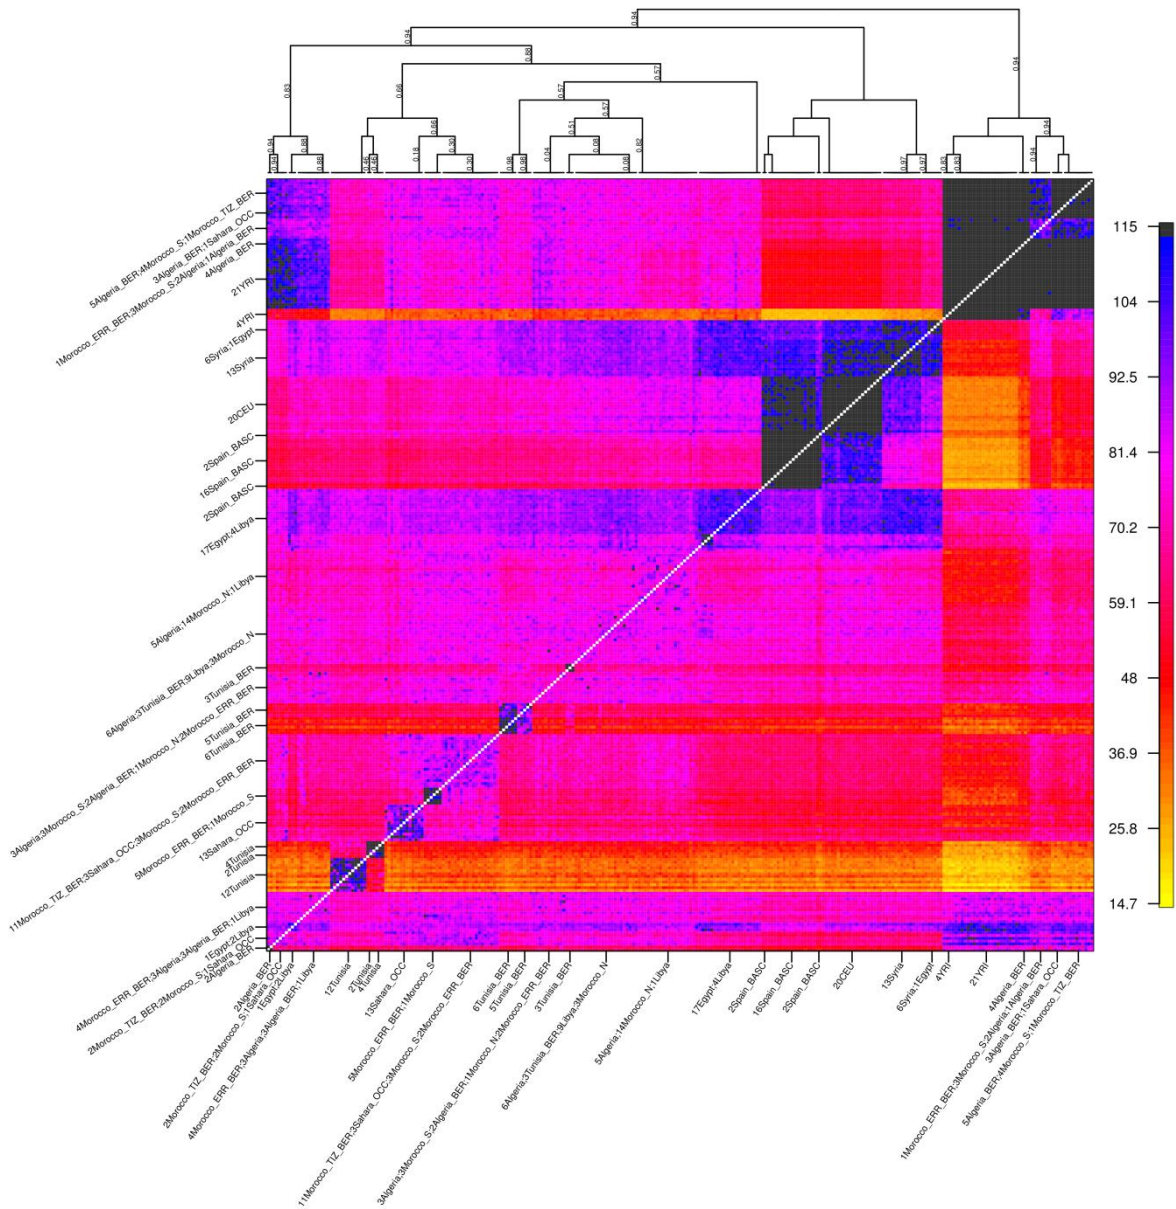

63  
 64 **S6 Fig. Chunklength coancestry matrix.** Heatmap and dendrogram of the chunklength  
 65 coancestry matrix estimated with ChromoPainter setting all individuals as donors and  
 66 recipients.

67

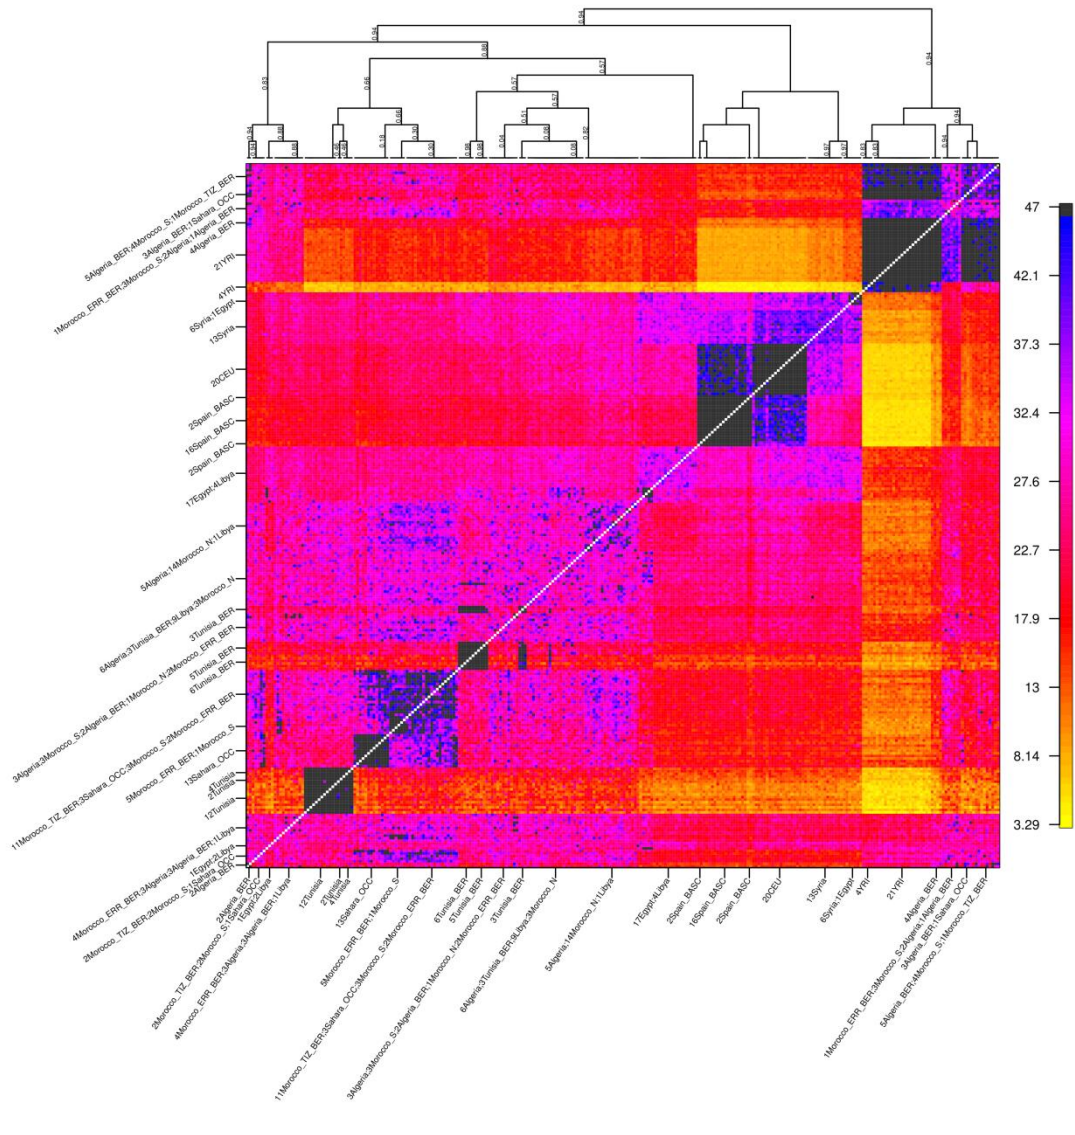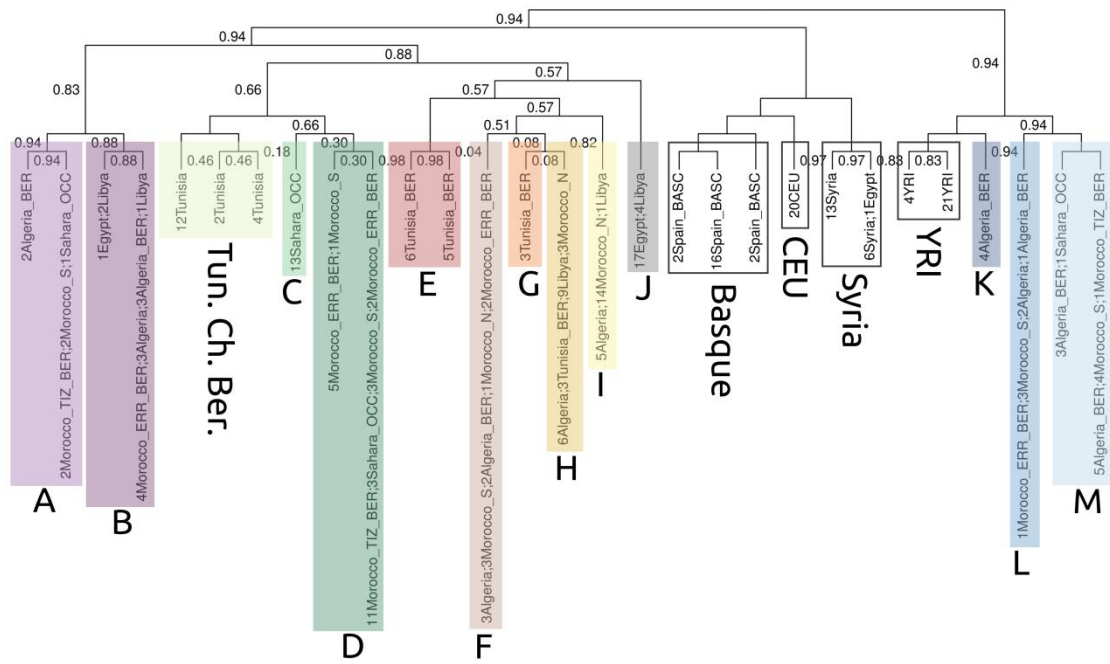

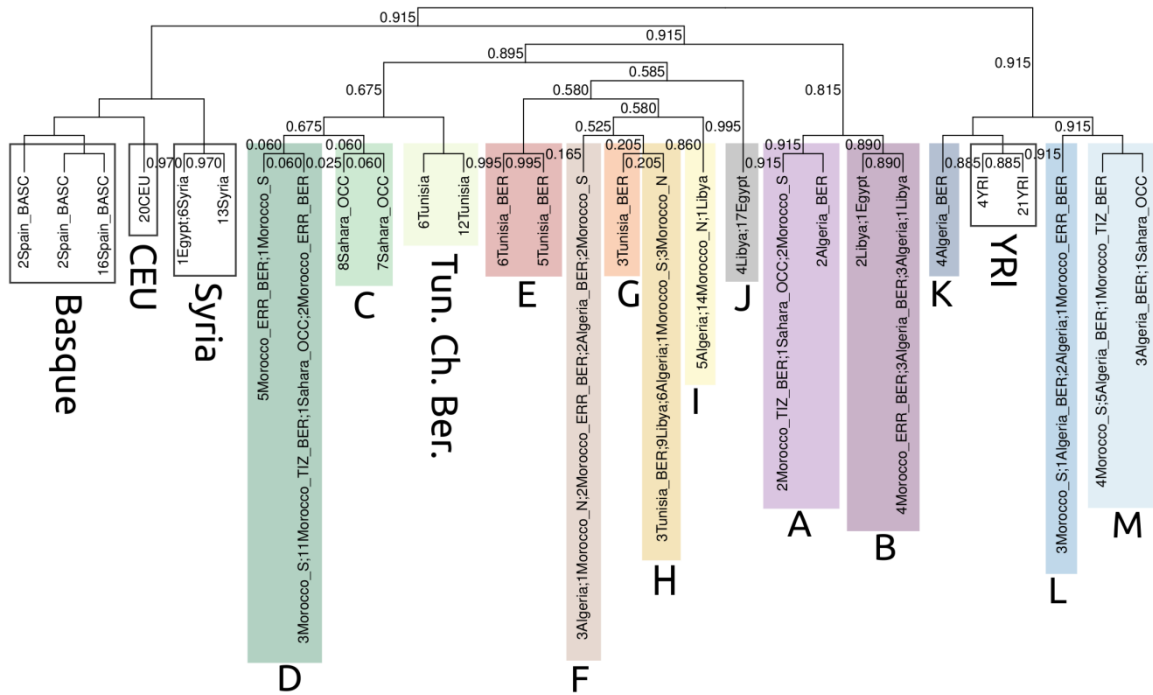

69

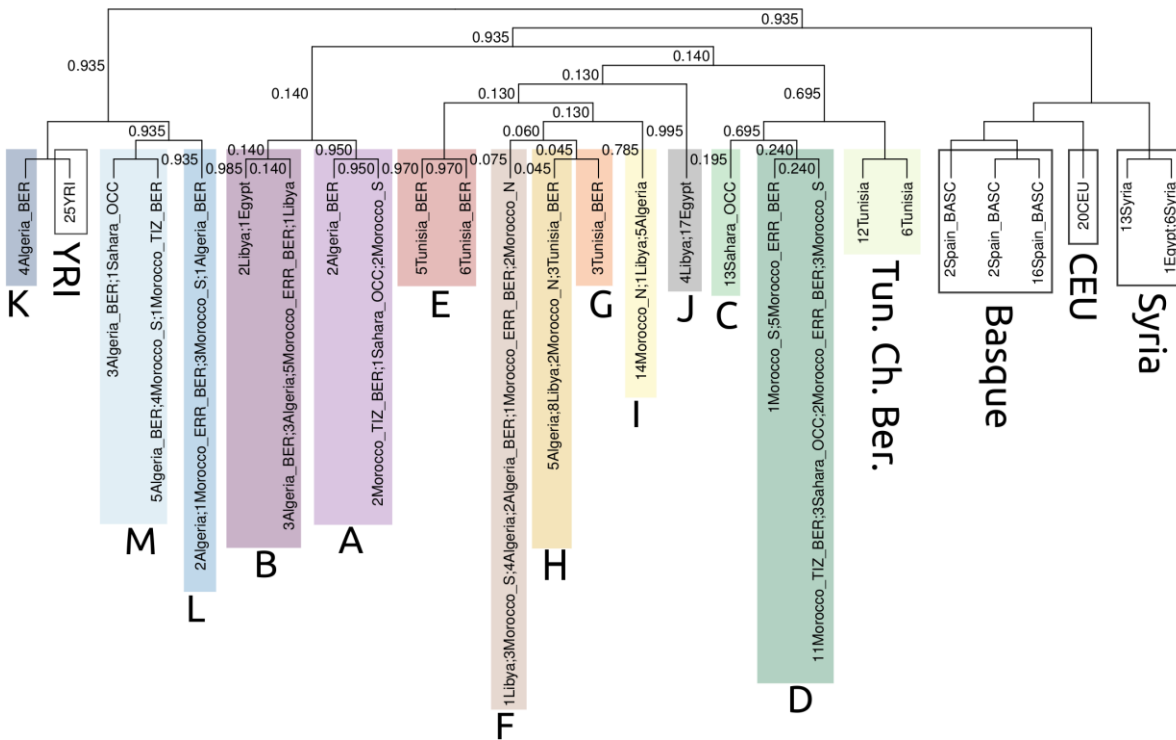

70 **S7 Fig. Chunkcounts coancestry matrix and dendrograms.** Heatmap and  
 71 dendrograms of the chunkcounts coancestry matrix estimated with ChromoPainter  
 72 setting all individuals as donors and recipients. Three dendrograms of FineStructure are  
 73 shown for three different seeds.



### YRI

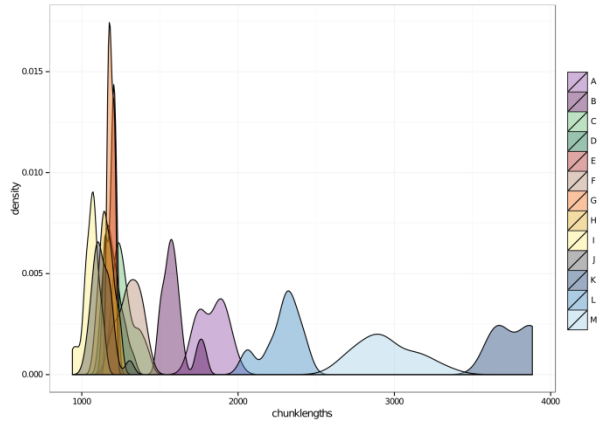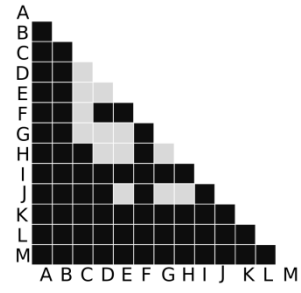

### Basque

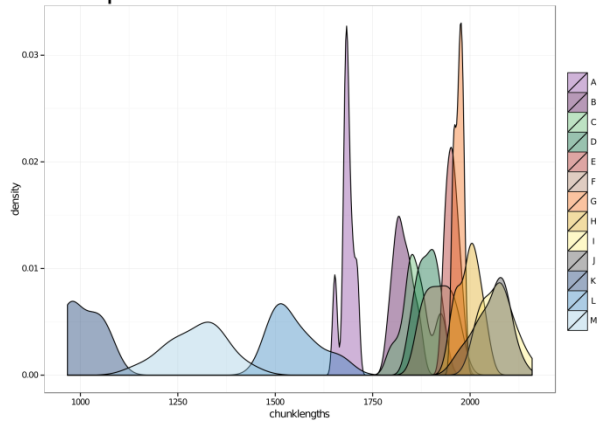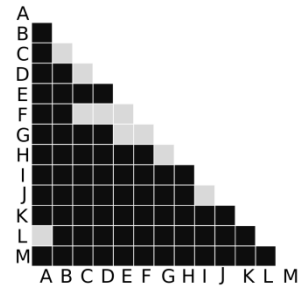

### Syria

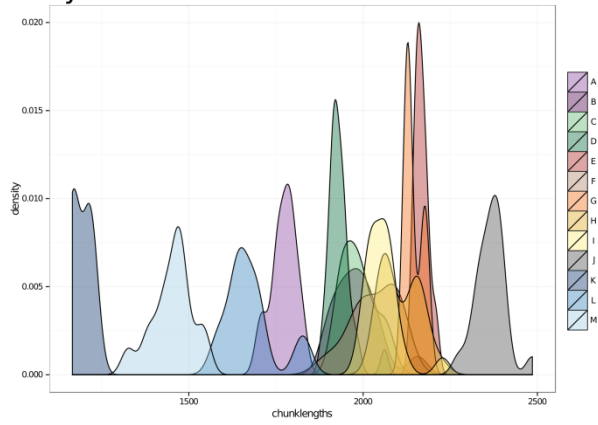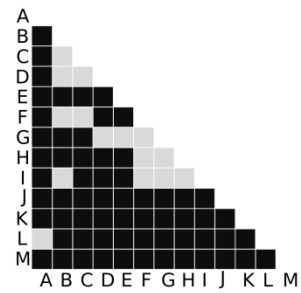

### Tun\_Chen\_Ber

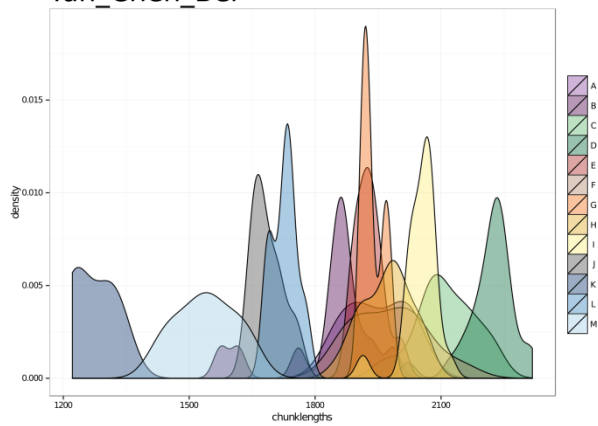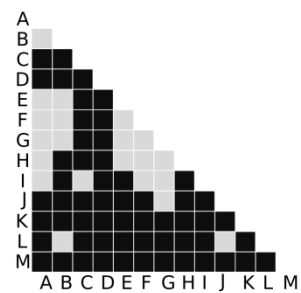

75 **S8 Fig. Differential admixture.** At the left, density plots for the total lengths of the  
76 chunks copied from each of the surrogate populations (YRI, Basque, Syria,  
77 Tun\_Chen\_Ber) to the individuals of each cluster (A-M) for the  
78 ChromoPainter analysis setting donors. At the right, significantly different (Bonferroni  
79 corrected p-values > 0.05) pairs of clusters distributions compared with t-test are  
80 highlighted in the darker gray while non-significant values are painted in light gray.

81

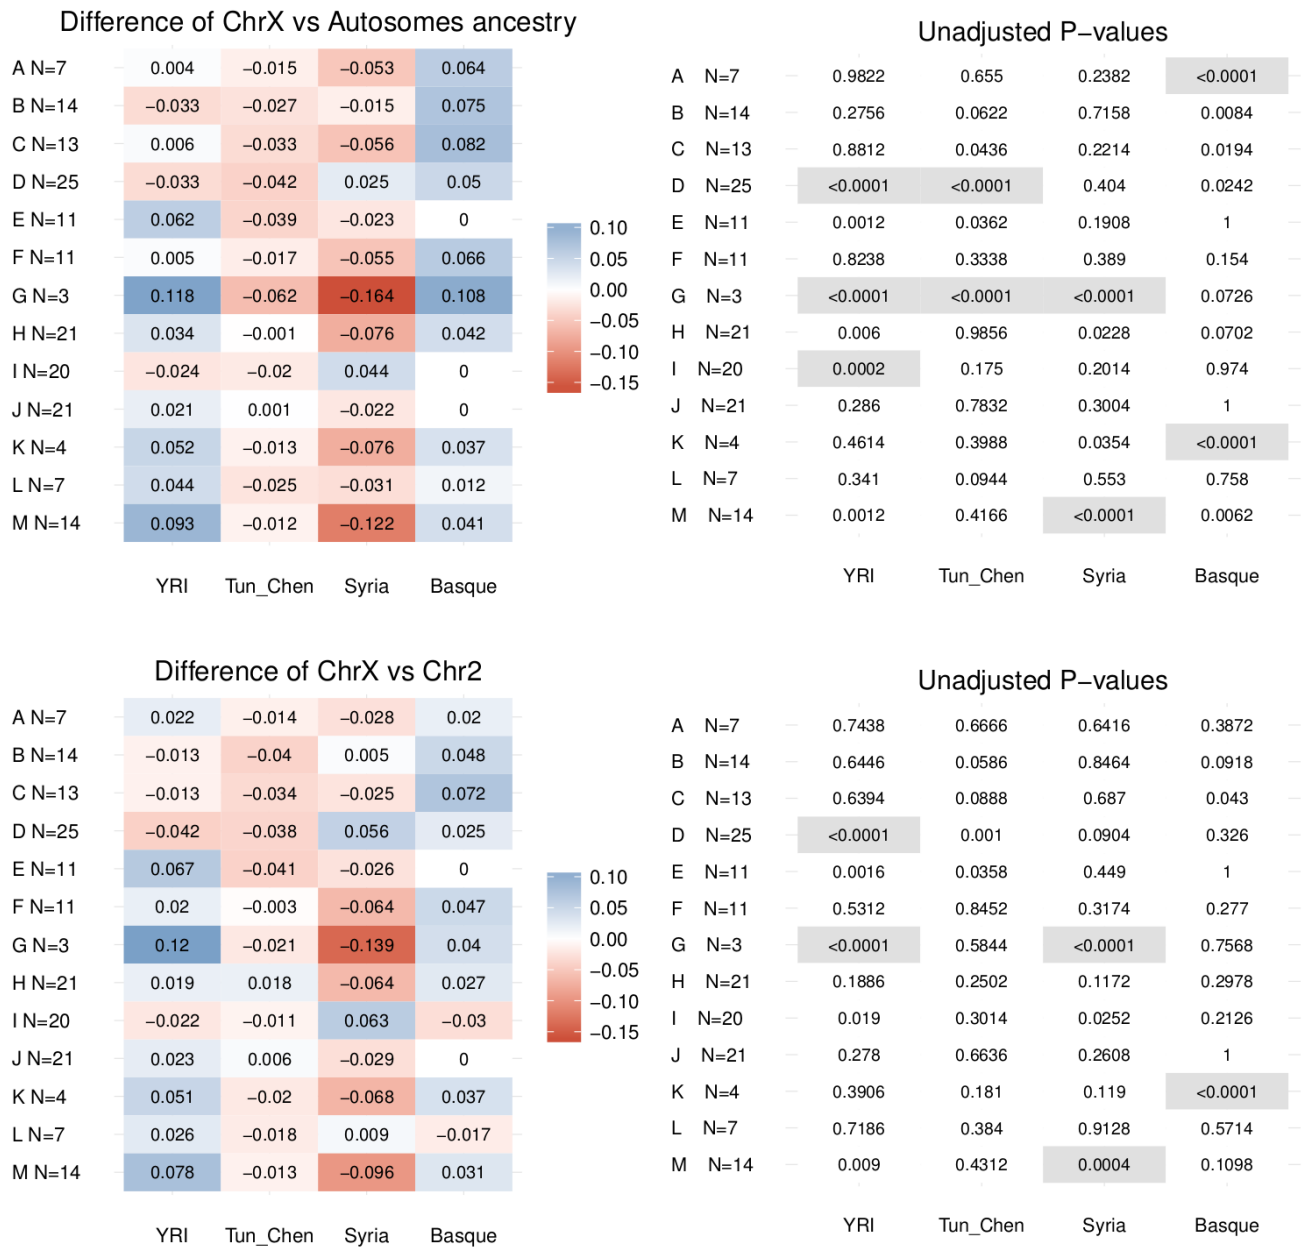

82 **S9 Fig. Comparison of ancestry estimations on the X chromosome and autosomes.**

83 In order to detect sexual bias in the North African clusters, difference between the X  
84 and autosomes, X and chromosome 2 proportions of each ancestry for each North  
85 African cluster were estimated as described in the Material and Methods section. The  
86 comparison with chromosome 2 was chosen due to similar number and density of SNPs  
87 when comparing with the X chromosome. The left figures show the difference between  
88 the ancestry proportions of the four donors for the X chromosome and the autosomes  
89 and chromosome 2 and X, from top bottom. Positive values (blueish colors) indicate  
90 more ancestry proportion in the X chromosome, whereas negative values (reddish  
91 colors) indicate more ancestry proportion in autosomes or chromosome 2. P-values are  
92 shown on the right, highlighting the significant values after Bonferroni correction.

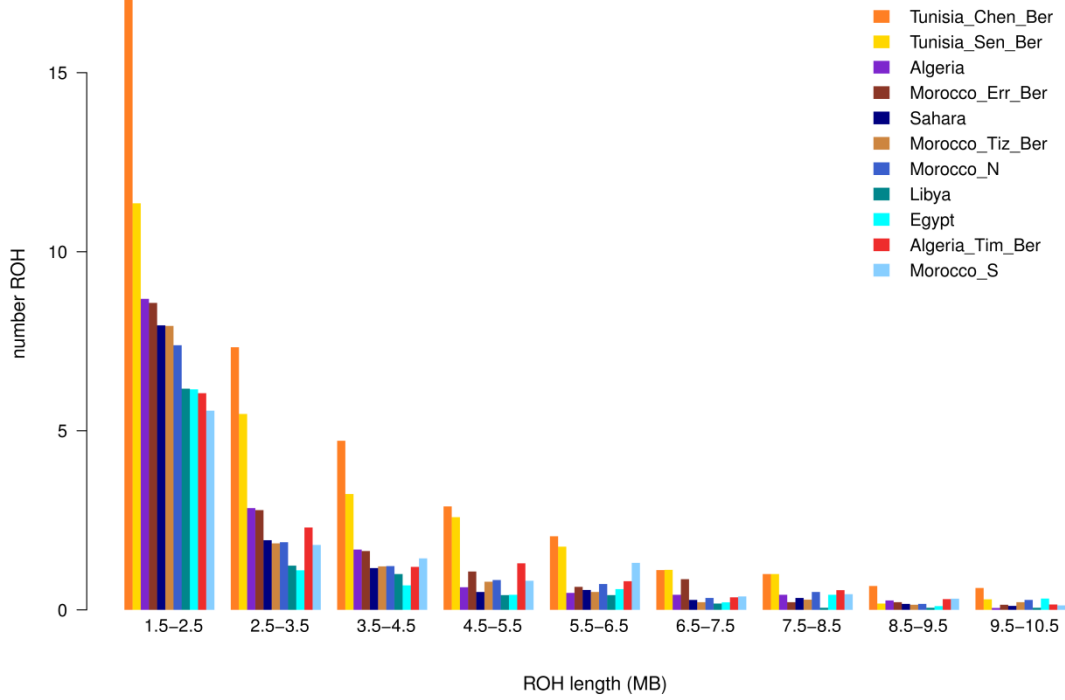

93

94 **S10 Fig. Runs of homozygosity (ROH) analysis of the samples clustered by**  
 95 **geographical origin.**

96

97

98

99

100

101

102

103

104

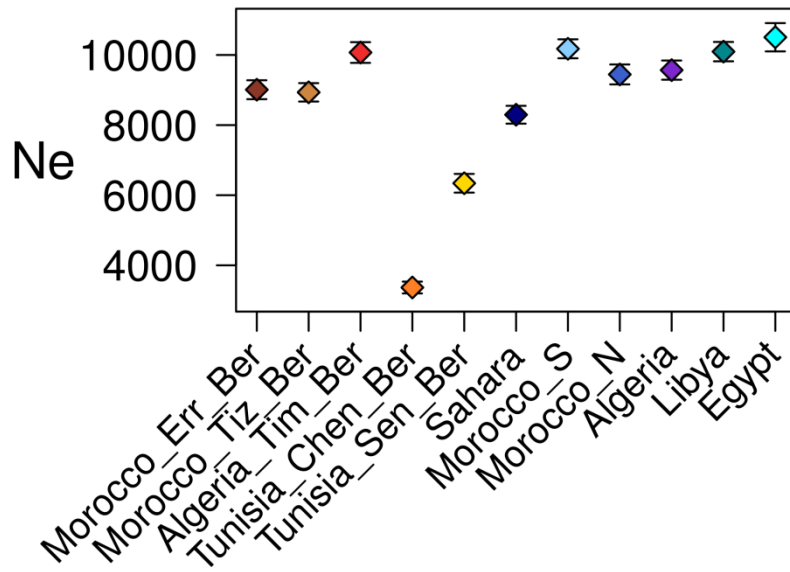

105

106 **S11 Fig. Effective population size (Ne) estimated for each population.**

107

108

109

110

111

112

113

114

115

116

117

118

119

120

121

122

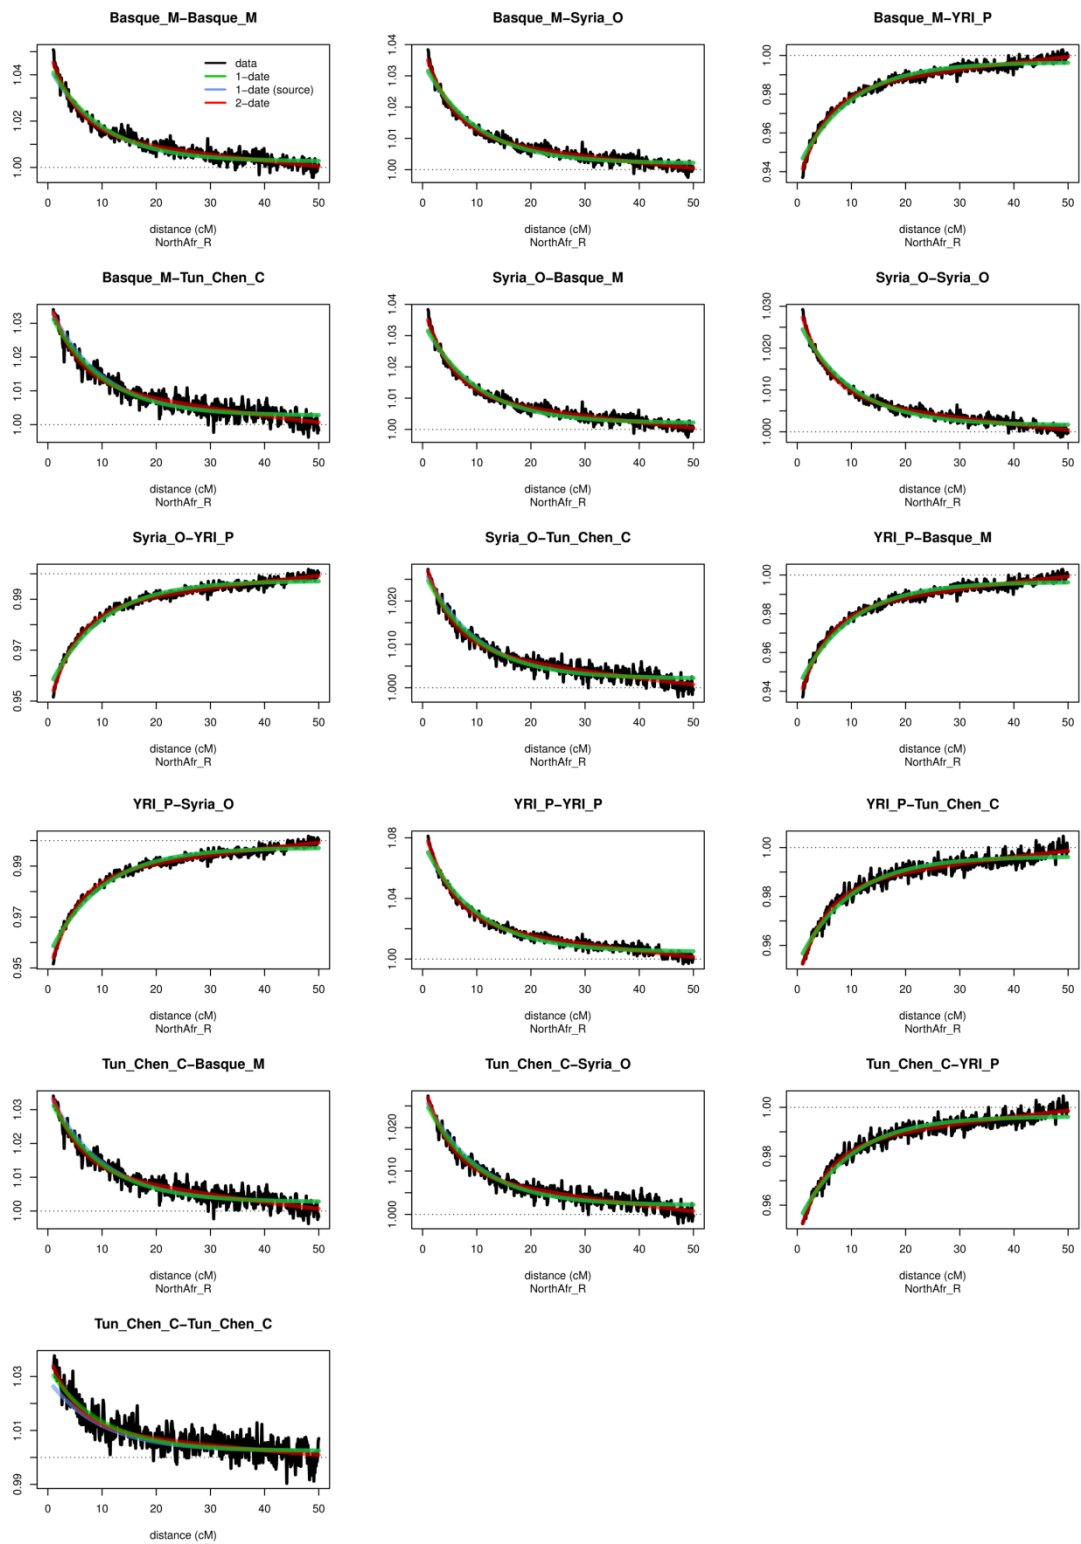

123

124 **S12 Fig. Globetrotter.** Globetrotter model curves estimated for cluster of individuals R.

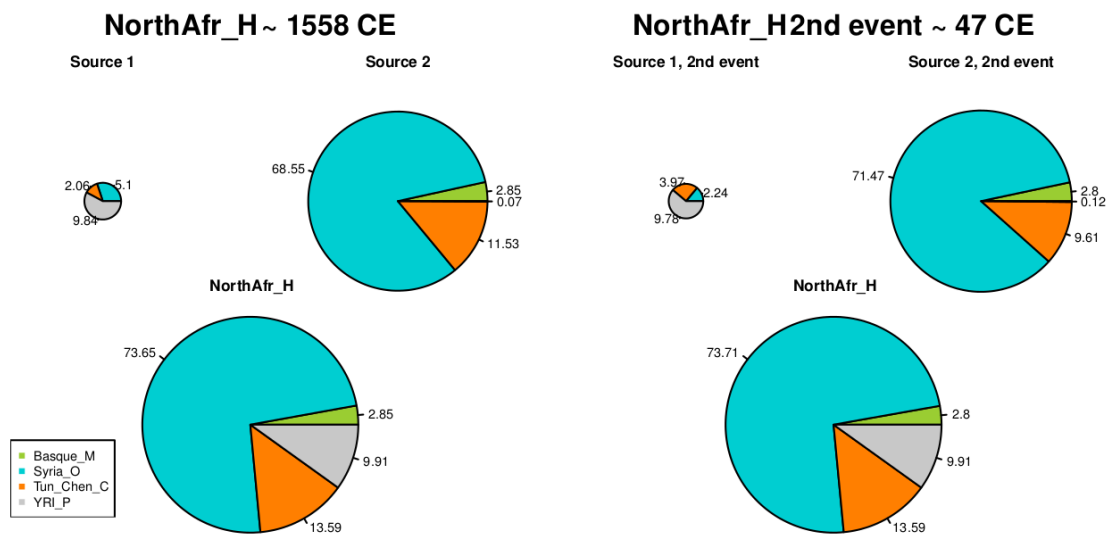

125

126 **S13 Fig. Globetrotter.** Example of pieplots showing the proportions of the source  
 127 populations and the admixed resultant population and dates estimated with Globetrotter  
 128 for cluster H.

129

130

131

132

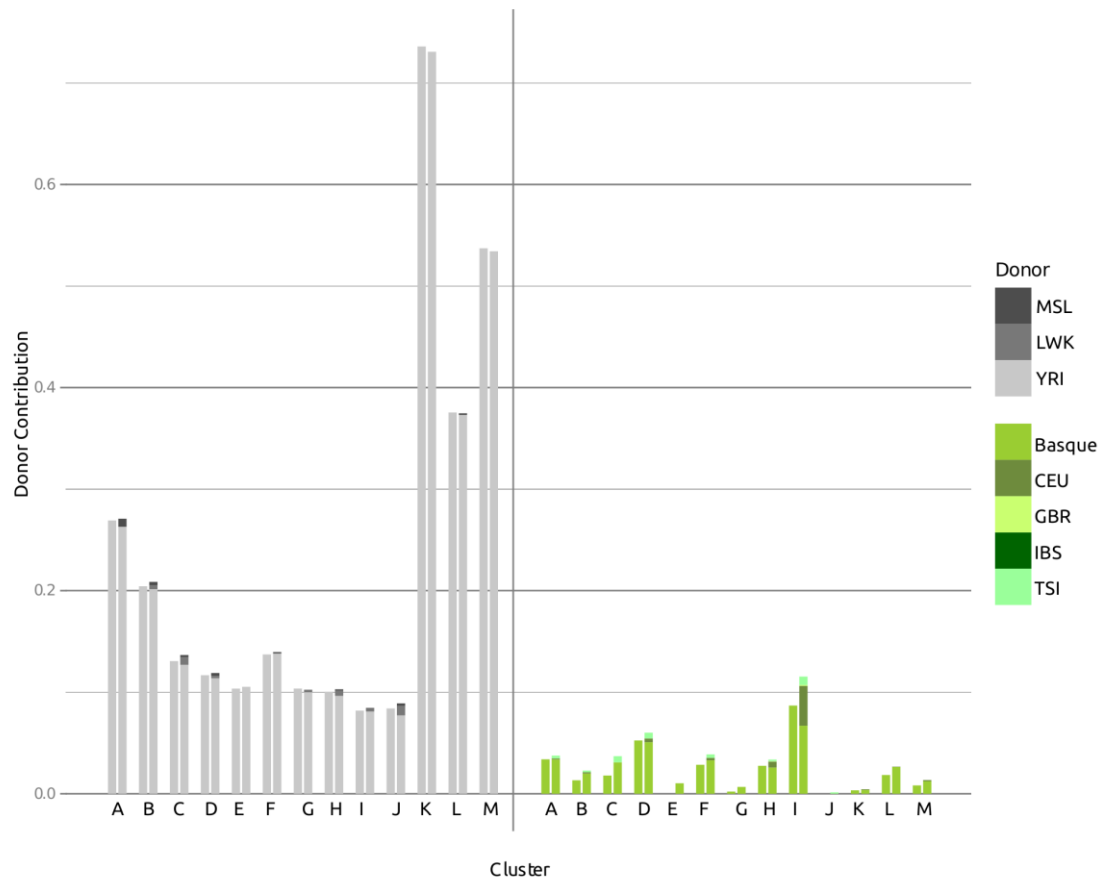

133

134 **S14 Fig. Haplotype sharing proportions by cluster using different source**  
 135 **populations.** In most of the analyses, four ancestral populations were chosen (Yoruba,  
 136 Basques, Syrians, and Tunisians from Chenini). In order to evaluate if the use of other  
 137 ancestral proxies might affect our results, data from 1000 Genomes Phase 3 were  
 138 considered. For each cluster in the x axis, the comparison between two ChromoPainter  
 139 analyses is shown: the contribution of a single donor population per source region (left  
 140 bar) and the contribution of multiple donor populations per source region (right bar) for  
 141 sub-Saharan Africa (grayish colors) and Europe (greenish colors). No differences are  
 142 found when considering extra ancestral proxies to the admixture estimations.

143

144

145

146

147



|                              |              | I                     | E                    | G                    | J                    | C                    | F                    | H                    | M                    | K                    | B                    | D                    | A                    | L                    |                     |       |
|------------------------------|--------------|-----------------------|----------------------|----------------------|----------------------|----------------------|----------------------|----------------------|----------------------|----------------------|----------------------|----------------------|----------------------|----------------------|---------------------|-------|
|                              |              | one-date-<br>multiway | one-date             | one-date             | one-date             | one-date             | one-date             | multiple-<br>dates   | one-date             | one-date             | multiple-<br>dates   | multiple-<br>dates   | multiple-<br>dates   | multiple-<br>dates   |                     |       |
| Mean date                    |              | 1144 CE               | 1256 CE              | 1296 CE              | 1311 CE              | 1384 CE              | 1472 CE              | 1568CE               | 1646 CE              | 1670 CE              | 1727 CE              | 1745 CE              | 1846 CE              | 1936 CE              |                     |       |
| SD (+/-)                     |              | 58 years              | 68 years             | 82 years             | 45 years             | 72 years             | 58 years             | 85 years             | 21 years             | 74 years             | 80 years             | 146 years            | 38 years             | 60 years             |                     |       |
| Median date                  |              | 1148 CE               | 1248 CE              | 1292 CE              | 1312 CE              | 1373 CE              | 1473 CE              | 1568 CE              | 1646 CE              | 1668 CE              | 1721 CE              | 1766 CE              | 1844 CE              | 1972 CE              |                     |       |
| CI 95%                       |              | 1029 CE -<br>1255 CE  | 1147 CE -<br>1397 CE | 1136 CE -<br>1437 CE | 1213 CE -<br>1393 CE | 1258 CE -<br>1520 CE | 1365 CE -<br>1573 CE | 1431 CE -<br>1715 CE | 1604 CE -<br>1683 CE | 1517 CE -<br>1807 CE | 1597 CE -<br>1941 CE | 1474 CE -<br>1972 CE | 1780 CE -<br>1924 CE | 1782 CE -<br>1972 CE |                     |       |
| Most recent admixture events | Minor source | YRI                   | 0.083                | 0.108                | 0.098                | 0.098                | 0.128                | 0.135                | 0.098                | 0.031                | 0.07                 | 0.2                  | 0.000                | 0.267                | 0.372               |       |
|                              |              | Basque                | 0.000                | 0.000                | 0.000                | 0.000                | 0.000                | 0.000                | 0.000                | 0.000                | 0.000                | 0.000                | 0.056                | 0.000                | 0.000               |       |
|                              |              | Tun.Chen.Ber.         | 0.036                | 0.012                | 0.006                | 0.000                | 0.038                | 0.022                | 0.021                | 0.076                | 0.044                | 0.025                | 0.126                | 0.041                | 0.026               |       |
|                              |              | Syria                 | 0.001                | 0.000                | 0.006                | 0.002                | 0.054                | 0.004                | 0.051                | 0.353                | 0.196                | 0.115                | 0.308                | 0.142                | 0.092               |       |
|                              |              | Total                 | 0.12                 | 0.12                 | 0.11                 | 0.1                  | 0.22                 | 0.161                | 0.17                 | 0.46                 | 0.31                 | 0.34                 | 0.49                 | 0.45                 | 0.49                |       |
|                              | Major source | YRI                   | 0.000                | 0.000                | 0.004                | 0.000                | 0.001                | 0.001                | 0.001                | 0.505                | 0.665                | 0.002                | 0.116                | 0.002                | 0.003               |       |
|                              |              | Basque                | 0.101                | 0.000                | 0.000                | 0.000                | 0.018                | 0.026                | 0.028                | 0.006                | 0.000                | 0.005                | 0.000                | 0.037                | 0.019               |       |
|                              |              | Tun.Chen.Ber.         | 0.13                 | 0.106                | 0.116                | 0.036                | 0.151                | 0.125                | 0.115                | 0.027                | 0.02                 | 0.088                | 0.098                | 0.131                | 0.098               |       |
|                              |              | Syria                 | 0.649                | 0.774                | 0.77                 | 0.864                | 0.609                | 0.688                | 0.685                | 0.002                | 0.004                | 0.565                | 0.296                | 0.381                | 0.389               |       |
|                              |              | Total                 | 0.88                 | 0.88                 | 0.89                 | 0.9                  | 0.78                 | 0.84                 | 0.83                 | 0.54                 | 0.69                 | 0.66                 | 0.51                 | 0.55                 | 0.51                |       |
|                              |              |                       |                      |                      |                      |                      |                      |                      | H                    |                      |                      | B                    | D                    | A                    | L                   |       |
| Mean date                    |              |                       |                      |                      |                      |                      |                      |                      | 35 CE                |                      |                      | 514 CE               | 155 BC               | 643 CE               | 1286 CE             |       |
| SD (+/-)                     |              |                       |                      |                      |                      |                      |                      |                      | 501 years            |                      |                      | 441 years            | 723 years            | 273 years            | 304 years           |       |
| Median date                  |              |                       |                      |                      |                      |                      |                      |                      | 114 CE               |                      |                      | 548 CE               | 26 BC                | 635 CE               | 1381 CE             |       |
| CI 95%                       |              |                       |                      |                      |                      |                      |                      |                      | 991 BC -<br>774 CE   |                      |                      | 433 BC -<br>1330 CE  | 1729 BC -<br>797 CE  | 86 CE -<br>1101 CE   | 463 CE -<br>1531 CE |       |
| Oldest admixture events      | Minor source | YRI                   |                      |                      |                      |                      |                      |                      |                      | 0.098                |                      |                      | 0.201                | 0.118                | 0.266               | 0.372 |
|                              |              | Basque                |                      |                      |                      |                      |                      |                      |                      | 0.000                |                      |                      | 0.000                | 0.000                | 0.000               | 0.000 |
|                              |              | Tun.Chen.Ber.         |                      |                      |                      |                      |                      |                      |                      | 0.04                 |                      |                      | 0.043                | 0.086                | 0.091               | 0.036 |
|                              |              | Syria                 |                      |                      |                      |                      |                      |                      |                      | 0.022                |                      |                      | 0.096                | 0.027                | 0.113               | 0.072 |
|                              |              | Total                 |                      |                      |                      |                      |                      |                      |                      | 0.16                 |                      |                      | 0.34                 | 0.23                 | 0.47                | 0.48  |
|                              | Major source | YRI                   |                      |                      |                      |                      |                      |                      |                      | 0.001                |                      |                      | 0.002                | 0.000                | 0.002               | 0.003 |
|                              |              | Basque                |                      |                      |                      |                      |                      |                      |                      | 0.028                |                      |                      | 0.005                | 0.064                | 0.036               | 0.019 |
|                              |              | Tun.Chen.Ber.         |                      |                      |                      |                      |                      |                      |                      | 0.096                |                      |                      | 0.071                | 0.139                | 0.081               | 0.089 |
|                              |              | Syria                 |                      |                      |                      |                      |                      |                      |                      | 0.715                |                      |                      | 0.583                | 0.567                | 0.411               | 0.41  |
|                              |              | Total                 |                      |                      |                      |                      |                      |                      |                      | 0.84                 |                      |                      | 0.66                 | 0.77                 | 0.53                | 0.52  |

148 **S1 Table. Globetrotter results summary.** Mean and standard deviations (SD in years) estimated dates, and median and CI of 95% for the  
149 different clusters are shown. Clusters with only one date event are shown in the top table, whereas multiple events are shown in both tables (top:  
150 recent events; bottom: old events).

| Population                            | Number of individuals | Dataset                  | Microarray                             |
|---------------------------------------|-----------------------|--------------------------|----------------------------------------|
| Luhya, Webuye, Kenya                  | 25                    | HapMap                   | Illumina Human1M<br>Affymetrix SNP 6.0 |
| Yoruba, Ibadan, Nigeria               | 25                    | HapMap                   | Illumina Human1M<br>Affymetrix SNP 6.0 |
| Morocco North                         | 18                    | Henn et al. 2012         | Affymetrix SNP 6.0                     |
| Morocco South                         | 16                    | Henn et al. 2012         | Affymetrix SNP 6.0                     |
| Moroccan Berbers, Errachidia          | 14                    | Current study            | Affymetrix SNP 6.0                     |
| Moroccan Berbers, Tiznit              | 14                    | Current study            | Affymetrix SNP 6.0                     |
| Occidental Sahara                     | 18                    | Henn et al. 2012         | Affymetrix SNP 6.0                     |
| Algerian, Alger                       | 19                    | Henn et al. 2012         | Affymetrix SNP 6.0                     |
| Algerian Berbers, Timimoun            | 20                    | Current study            | Affymetrix SNP 6.0                     |
| Algerian Mozabites Berbers            | 29                    | HGDP                     | Illumina 650Y                          |
| Tunisian Berbers, Chenini             | 18                    | Henn et al. 2012         | Affymetrix SNP 6.0                     |
| Tunisian Berbers, Sened               | 17                    | Current study            | Affymetrix SNP 6.0                     |
| Libya                                 | 17                    | Henn et al. 2012         | Affymetrix SNP 6.0                     |
| Egypt                                 | 19                    | Henn et al. 2012         | Affymetrix SNP 6.0                     |
| Bedouin, Jordan                       | 25                    | HGDP                     | Illumina 650Y                          |
| Druze, Israel                         | 25                    | HGDP                     | Illumina 650Y                          |
| Palestinian                           | 25                    | HGDP                     | Illumina 650Y                          |
| Qatar                                 | 25                    | Hunter-Zinck et al. 2010 | Affymetrix 500k                        |
| Lebanon                               | 24                    | Haber et al. 2012        | Illumina 610K/ 660K                    |
| Syria                                 | 19                    | Current study            | Affymetrix SNP 6.0                     |
| Canary Islands                        | 17                    | Botigué et al. 2013      | Affymetrix SNP 6.0                     |
| Andalusian, Spain                     | 17                    | Botigué et al. 2013      | Affymetrix SNP 6.0                     |
| Galician, Spain                       | 17                    | Botigué et al. 2013      | Affymetrix SNP 6.0                     |
| Basque, Spain                         | 20                    | Henn et al. 2012         | Affymetrix SNP 6.0                     |
| Tuscan, Italy                         | 25                    | HapMap                   | Illumina Human1M<br>Affymetrix SNP 6.0 |
| Northern and Western European in Utah | 25                    | HapMap                   | Illumina Human1M<br>Affymetrix SNP 6.0 |
| Total                                 | 533                   |                          |                                        |

151

152 **S2 Table. Dataset.** Complete dataset of populations included in the analysis. For some  
153 analyses, only a subset of these populations was used in order to maximize the number  
154 of SNPs within the analysis. Berbers are highlighted in orange.

155

156

| <b>Large dataset (with HGDP samples from Middle East)</b>   |                       |
|-------------------------------------------------------------|-----------------------|
| <b>Step</b>                                                 | <b>Number of SNPs</b> |
| Raw data (for current study samples), all markers genotyped | 909,622               |
| Raw data (for current study samples), autosomal markers     | 868,366               |
| Merged dataset filtered (missing SNPs and HWE)              | 17,620                |
| Merged dataset with minor allele frequency filter           | 16,980                |
| Merged dataset with LD pruning                              | 16,185                |

157

| <b>Reduced dataset (only affymetrix 6.0 samples)</b>        |                       |
|-------------------------------------------------------------|-----------------------|
| <b>Step</b>                                                 | <b>Number of SNPs</b> |
| Raw data (for current study samples), all markers genotyped | 909,622               |
| Raw data (for current study samples), autosomal markers     | 868,366               |
| Merged dataset filtered (missing SNPs and HWE)              | 165,340               |
| Merged dataset with minor allele frequency filter           | 153,909               |
| Merged dataset with LD pruning                              | 94,905                |

158

| <b>North Africa samples with Mozabites</b>                  |                       |
|-------------------------------------------------------------|-----------------------|
| <b>Step</b>                                                 | <b>Number of SNPs</b> |
| Raw data (for current study samples), all markers genotyped | 909,622               |
| Raw data (for current study samples), autosomal markers     | 868,366               |
| Merged dataset filtered (missing SNPs and HWE)              | 84,450                |
| Merged dataset with minor allele frequency filter           | 71,972                |
| Merged dataset with LD pruning                              | 67,786                |

159

| <b>North Africa samples (without Mozabites)</b>             |                       |
|-------------------------------------------------------------|-----------------------|
| <b>Step</b>                                                 | <b>Number of SNPs</b> |
| Raw data (for current study samples), all markers genotyped | 909,622               |
| Raw data (for current study samples), autosomal markers     | 868,366               |
| Merged dataset filtered (missing SNPs and HWE)              | 500,237               |
| Merged dataset with minor allele frequency filter           | 386,463               |
| Merged dataset with LD pruning                              | 200,538               |

160

| <b>Haplotype-based methods dataset</b>                      |                       |
|-------------------------------------------------------------|-----------------------|
| <b>Step</b>                                                 | <b>Number of SNPs</b> |
| Raw data (for current study samples), all markers genotyped | 909,622               |
| Raw data (for current study samples), autosomal markers     | 868,366               |
| Merged dataset filtered (missing SNPs and HWE)              | 327,356               |
| Merged dataset with minor allele frequency filter           | 293,908               |

161

162 **S3 Table. SNP density.** SNP density for all datasets used considering the different  
 163 filters applied.

164

165

|                            | DIFFERENCES |        |          |        |        | P-VALUES |       |          |       |        |
|----------------------------|-------------|--------|----------|--------|--------|----------|-------|----------|-------|--------|
|                            | Cluster     | YRI    | Tun_Chen | Syria  | Basque | Cluster  | YRI   | Tun_Chen | Syria | Basque |
| Chr 1 vs rest of autosomes | A           | 0.047  | -0.014   | -0.009 | -0.024 | A        | 0.011 | 0.235    | 0.896 | 0.098  |
|                            | B           | -0.013 | 0.008    | 0.008  | -0.003 | B        | 0.262 | 0.389    | 0.410 | 0.489  |
|                            | C           | -0.003 | -0.010   | 0.028  | -0.016 | C        | 0.578 | 0.312    | 0.110 | 0.065  |
|                            | D           | -0.006 | 0.007    | 0.008  | -0.009 | D        | 0.275 | 0.742    | 0.304 | 0.313  |
|                            | E           | 0.026  | 0.002    | -0.028 | 0.000  | E        | 0.052 | 0.908    | 0.089 | 1.000  |
|                            | F           | 0.000  | 0.011    | 0.011  | -0.022 | F        | 0.894 | 0.421    | 0.685 | 0.103  |
|                            | G           | -0.019 | 0.027    | -0.008 | 0.000  | G        | 0.304 | 0.000    | 0.516 | 1.000  |
|                            | H           | -0.010 | -0.013   | 0.034  | -0.011 | H        | 0.148 | 0.069    | 0.036 | 0.373  |
|                            | I           | 0.001  | -0.004   | 0.014  | -0.012 | I        | 0.868 | 0.286    | 0.202 | 0.306  |
|                            | J           | -0.003 | -0.001   | 0.004  | 0.000  | J        | 0.662 | 0.845    | 0.644 | 1.000  |
|                            | K           | -0.030 | 0.027    | 0.003  | 0.000  | K        | 0.351 | 0.009    | 0.807 | 1.000  |
|                            | L           | 0.024  | 0.011    | -0.016 | -0.020 | L        | 0.415 | 0.436    | 0.607 | 0.119  |
|                            | M           | 0.017  | -0.002   | -0.018 | 0.003  | M        | 0.480 | 0.762    | 0.536 | 1.000  |
| Chr 2 vs rest of autosomes | Cluster     | YRI    | Tun_Chen | Syria  | Basque | Cluster  | YRI   | Tun_Chen | Syria | Basque |
|                            | A           | -0.018 | 0.002    | -0.033 | 0.050  | A        | 0.392 | 0.935    | 0.103 | 0.000  |
|                            | B           | -0.018 | 0.017    | -0.030 | 0.030  | B        | 0.191 | 0.251    | 0.379 | 0.040  |
|                            | C           | 0.023  | 0.004    | -0.040 | 0.013  | C        | 0.005 | 0.785    | 0.064 | 0.349  |
|                            | D           | 0.011  | 0.002    | -0.043 | 0.030  | D        | 0.044 | 0.595    | 0.009 | 0.006  |
|                            | E           | -0.001 | 0.005    | -0.005 | 0.000  | E        | 0.555 | 0.453    | 0.715 | 1.000  |
|                            | F           | -0.014 | -0.010   | 0.001  | 0.023  | F        | 0.219 | 0.073    | 0.757 | 0.025  |
|                            | G           | -0.004 | -0.041   | -0.024 | 0.068  | G        | 0.742 | 0.074    | 0.519 | 0.000  |
|                            | H           | 0.019  | -0.017   | -0.020 | 0.017  | H        | 0.026 | 0.011    | 0.285 | 0.092  |
|                            | I           | -0.001 | -0.005   | -0.027 | 0.034  | I        | 0.837 | 0.249    | 0.163 | 0.008  |
|                            | J           | -0.001 | -0.002   | 0.004  | 0.000  | J        | 0.919 | 0.600    | 0.718 | 1.000  |
|                            | K           | 0.003  | 0.009    | -0.012 | 0.000  | K        | 0.910 | 0.501    | 0.640 | 1.000  |
|                            | L           | 0.022  | -0.004   | -0.049 | 0.030  | L        | 0.382 | 0.691    | 0.039 | 0.000  |
| M                          | 0.021       | 0.002  | -0.036   | 0.013  | M      | 0.312    | 0.815 | 0.081    | 0.354 |        |
| Chr 3 vs rest of autosomes | Cluster     | YRI    | Tun_Chen | Syria  | Basque | Cluster  | YRI   | Tun_Chen | Syria | Basque |
|                            | A           | 0.036  | 0.031    | -0.109 | 0.042  | A        | 0.103 | 0.000    | 0.000 | 0.003  |
|                            | B           | 0.021  | 0.024    | -0.083 | 0.038  | B        | 0.346 | 0.038    | 0.000 | 0.003  |
|                            | C           | 0.023  | 0.012    | -0.070 | 0.035  | C        | 0.040 | 0.387    | 0.009 | 0.020  |
|                            | D           | 0.015  | 0.015    | -0.058 | 0.029  | D        | 0.000 | 0.129    | 0.003 | 0.034  |
|                            | E           | 0.023  | -0.003   | -0.020 | 0.000  | E        | 0.096 | 0.712    | 0.173 | 1.000  |
|                            | F           | 0.017  | 0.011    | -0.049 | 0.022  | F        | 0.213 | 0.439    | 0.239 | 0.454  |
|                            | G           | 0.035  | 0.008    | -0.071 | 0.028  | G        | 0.000 | 0.812    | 0.000 | 0.074  |
|                            | H           | 0.022  | 0.011    | -0.063 | 0.029  | H        | 0.005 | 0.279    | 0.000 | 0.020  |
|                            | I           | 0.023  | 0.011    | -0.081 | 0.047  | I        | 0.000 | 0.342    | 0.000 | 0.005  |
|                            | J           | -0.004 | 0.017    | -0.013 | 0.000  | J        | 0.616 | 0.000    | 0.149 | 1.000  |
|                            | K           | -0.029 | 0.005    | 0.016  | 0.008  | K        | 0.072 | 0.031    | 0.289 | 0.761  |
|                            | L           | -0.025 | 0.023    | -0.001 | 0.004  | L        | 0.527 | 0.056    | 0.894 | 0.817  |
| M                          | 0.043       | 0.002  | -0.052   | 0.008  | M      | 0.063    | 0.918 | 0.016    | 0.699 |        |
| Chr 4 vs rest of autosomes | Cluster     | YRI    | Tun_Chen | Syria  | Basque | Cluster  | YRI   | Tun_Chen | Syria | Basque |
|                            | A           | -0.013 | 0.020    | -0.013 | 0.005  | A        | 0.479 | 0.021    | 0.738 | 0.912  |
|                            | B           | -0.026 | 0.008    | 0.021  | -0.002 | B        | 0.137 | 0.518    | 0.181 | 0.577  |
|                            | C           | -0.004 | 0.004    | 0.010  | -0.009 | C        | 0.573 | 0.846    | 0.622 | 0.318  |
|                            | D           | 0.005  | 0.016    | 0.005  | -0.026 | D        | 0.228 | 0.159    | 0.415 | 0.008  |
|                            | E           | 0.017  | 0.003    | -0.019 | 0.000  | E        | 0.042 | 0.779    | 0.099 | 1.000  |
|                            | F           | 0.058  | 0.026    | -0.104 | 0.021  | F        | 0.002 | 0.053    | 0.000 | 0.486  |
|                            | G           | -0.006 | 0.032    | -0.025 | 0.000  | G        | 0.525 | 0.000    | 0.000 | 1.000  |
|                            | H           | -0.007 | -0.006   | 0.037  | -0.025 | H        | 0.365 | 0.479    | 0.065 | 0.021  |
|                            | I           | 0.001  | -0.001   | 0.002  | -0.003 | I        | 0.823 | 0.711    | 0.643 | 0.579  |
|                            | J           | 0.001  | 0.000    | 0.000  | 0.000  | J        | 0.858 | 0.901    | 0.943 | 1.000  |
|                            | K           | 0.037  | -0.004   | -0.038 | 0.004  | K        | 0.040 | 0.542    | 0.238 | 0.649  |
|                            | L           | 0.002  | 0.000    | 0.020  | -0.021 | L        | 0.917 | 0.781    | 0.331 | 0.000  |
| M                          | -0.015      | 0.005  | -0.007   | 0.017  | M      | 0.525    | 0.750 | 0.935    | 0.195 |        |

|                            | DIFFERENCES |        |          |        |        | P-VALUES |       |          |       |        |
|----------------------------|-------------|--------|----------|--------|--------|----------|-------|----------|-------|--------|
|                            | Cluster     | YRI    | Tun_Chen | Syria  | Basque | Cluster  | YRI   | Tun_Chen | Syria | Basque |
| Chr 5 vs rest of autosomes | A           | -0.068 | 0.007    | 0.079  | -0.018 | A        | 0.004 | 0.776    | 0.049 | 0.388  |
|                            | B           | -0.020 | -0.015   | 0.029  | 0.006  | B        | 0.266 | 0.106    | 0.383 | 0.919  |
|                            | C           | 0.015  | 0.002    | -0.025 | 0.009  | C        | 0.111 | 0.949    | 0.222 | 0.790  |
|                            | D           | 0.002  | -0.020   | 0.021  | -0.003 | D        | 0.785 | 0.002    | 0.135 | 0.609  |
|                            | E           | 0.001  | -0.018   | 0.017  | 0.000  | E        | 0.911 | 0.031    | 0.214 | 1.000  |
|                            | F           | -0.028 | -0.006   | 0.044  | -0.010 | F        | 0.022 | 0.506    | 0.003 | 0.315  |
|                            | G           | -0.025 | 0.000    | 0.024  | 0.000  | G        | 0.000 | 0.815    | 0.300 | 1.000  |
|                            | H           | -0.030 | 0.000    | 0.017  | 0.013  | H        | 0.000 | 0.899    | 0.208 | 0.392  |
|                            | I           | -0.019 | -0.015   | 0.009  | 0.025  | I        | 0.001 | 0.019    | 0.448 | 0.109  |
|                            | J           | -0.027 | 0.000    | 0.027  | 0.000  | J        | 0.000 | 0.978    | 0.002 | 1.000  |
|                            | K           | 0.021  | -0.006   | -0.015 | 0.000  | K        | 0.641 | 0.637    | 0.637 | 1.000  |
|                            | L           | 0.008  | -0.022   | 0.011  | 0.003  | L        | 0.873 | 0.171    | 0.649 | 0.998  |
|                            | M           | 0.017  | -0.012   | -0.009 | 0.004  | M        | 0.622 | 0.203    | 0.856 | 0.963  |
| Chr 6 vs rest of autosomes | Cluster     | YRI    | Tun_Chen | Syria  | Basque | Cluster  | YRI   | Tun_Chen | Syria | Basque |
|                            | A           | -0.053 | 0.029    | 0.040  | -0.015 | A        | 0.037 | 0.040    | 0.092 | 0.179  |
|                            | B           | 0.023  | 0.010    | -0.045 | 0.011  | B        | 0.206 | 0.452    | 0.161 | 0.556  |
|                            | C           | -0.009 | 0.025    | -0.029 | 0.013  | C        | 0.080 | 0.027    | 0.332 | 0.525  |
|                            | D           | 0.002  | 0.038    | -0.060 | 0.020  | D        | 0.650 | 0.001    | 0.000 | 0.165  |
|                            | E           | 0.008  | -0.011   | 0.004  | 0.000  | E        | 0.735 | 0.322    | 0.773 | 1.000  |
|                            | F           | -0.004 | 0.030    | -0.053 | 0.027  | F        | 0.783 | 0.031    | 0.000 | 0.183  |
|                            | G           | -0.017 | 0.001    | 0.015  | 0.000  | G        | 0.592 | 0.742    | 0.592 | 1.000  |
|                            | H           | -0.002 | 0.012    | -0.040 | 0.030  | H        | 0.735 | 0.298    | 0.072 | 0.022  |
|                            | I           | -0.006 | 0.030    | -0.018 | -0.006 | I        | 0.317 | 0.004    | 0.482 | 0.502  |
|                            | J           | 0.011  | 0.005    | -0.017 | 0.000  | J        | 0.098 | 0.171    | 0.024 | 1.000  |
|                            | K           | 0.028  | 0.001    | -0.041 | 0.012  | K        | 0.331 | 0.932    | 0.108 | 0.084  |
|                            | L           | 0.019  | 0.015    | -0.017 | -0.018 | L        | 0.493 | 0.296    | 0.447 | 0.316  |
| M                          | -0.005      | 0.015  | -0.020   | 0.010  | M      | 0.712    | 0.246 | 0.473    | 0.670 |        |

167

168 **S4 Table. Comparison in the ancestry estimation between different autosomes. In**  
169 the left side the values for the comparisons between each chromosome from 1 to 6 vs  
170 the rest of autosomes are shown. The p-values for the corresponding comparisons are  
171 shown in the right side. Significant p-values are highlighted in orange.

172
